# Supplementary material
Source: MDPI journal article supplement (https://www.mdpi.com/2073-445X/11/10/1801)

**Table S1:** Check List of plant species along with taxonomic attributes (Status in Pakistan, family, Raunkier life form and Leaf size classes).

| Plant Name                                            | Local Name          | English Name            | LS | SP | Family        | M/D | HB | RLF  | LSC |
|-------------------------------------------------------|---------------------|-------------------------|----|----|---------------|-----|----|------|-----|
| <i>Abelmoschus esculentus</i> (L.) Moench             | Benday              | Ladies' fingers         | A  | CU | Malvaceae     | D   | H  | Megp | Mes |
| <i>Acacia Arabica</i> Mill.                           | Kikar               | Acacia                  | P  | NV | Fabaceae      | D   | T  | Np   | Mes |
| <i>Acacia modesta</i> Wall.                           | Palosa              | Phulahi                 | P  | NV | Leguminaceae  | D   | T  | Th   | Mic |
| <i>Acacia nilotica</i> (L.) Delile                    | Kikar               | gum arabic tree         | P  | NV | Mimosaceae    | D   | T  | Th   | Mic |
| <i>Achyranthes aspera</i> L.                          | Pathkanda           | Chaff flower            | P  | W  | Amaranthaceae | D   | H  | Np   | N   |
| <i>Adiantum capillus-veneris</i> L.                   | Sumbal              | Common maidenhair       | P  | NV | Adiantaceae   | **  | H  | Np   | Mic |
| <i>Adiantum caudatum</i> L.                           | Sumbal              | Tailed maidenhair       | P  | NV | Adiantaceae   | **  | H  | H    | Mic |
| <i>Adiantum venustum</i> D.                           | Sumbal              | Evergreen maidenhair    | P  | NV | Adiantaceae   | **  | H  | Np   | N   |
| <i>Ailanthus altissima</i> (Mill.) Swingle            | Spena Bakyanra      | Tree of heaven          | P  | N  | Simaroubaceae | D   | T  | Megp | Mes |
| <i>Ajuga bracteosa</i> Wall.ex Benth.                 | Butey               | Bugleweed               | P  | NV | Lamiaceae     | D   | H  | Ch   | Mes |
| <i>Alisma plantago-aquatica</i> L.                    | Jabai               | European water-plantain | P  | NV | Alismataceae  | M   | H  | Th   | N   |
| <i>Alnus nitida</i> (Spach) Endl.                     | Geray               | West Himalayan alder    | P  | NV | Betulaceae    | D   | T  | Th   | Mes |
| <i>Alternanthera pungens</i> Kunth.                   | Khaki Boti          | Joyweed                 | P  | I  | Amaranthaceae | D   | H  | Megp | Mes |
| <i>Amaranthus spinosus</i> L.                         | Ganha               | Spiny amaranth,         | A  | I  | Amaranthaceae | D   | H  | Th   | Mes |
| <i>Amaranthus viridis</i> L.                          | Chalwaye            | green amaranth          | A  | I  | Amaranthaceae | D   | H  | Megp | L   |
| <i>Amarathus spinosus</i> L.                          | Ganharh             | Spiny pigweed           | A  | I  | Amaranthaceae | D   | H  | Megp | L   |
| <i>Arisaema flavum</i> (Forsk.) Schott                | Marjara             | **                      | P  | NV | Araceae       | M   | H  | Mesp | N   |
| <i>Aristida adscensionis</i> L.                       | **                  | Three-awn grass         | P  | W  | Poaceae       | M   | H  | Megp | L   |
| <i>Artemisia vulgaris</i> L.                          | Tarkha              | Common mugwort          | P  | NV | Asteraceae    | D   | H  | Mesp | Mic |
| <i>Arundo donax</i> L.                                | Dorma               | Giant cane              | P  | N  | Poaceae       | M   | H  | Ch   | Mic |
| <i>Asparagus officinalis</i> L.                       | Tendona             | Sparrow grass           | P  | CU | Aspoledaceae  | M   | H  | Th   | Mic |
| <i>Bergenia ciliata</i> (Haw.) Sternb. f. ciliata Yeo | Kamar panra         | Fringed elephant's ears | P  | NV | Saxifragaceae | M   | H  | Th   | N   |
| <i>Berula erecta</i> (Huds.) Cov.                     | **                  | Lesser water-parsnip    | P  | NV | Apiaceae      | D   | H  | Th   | N   |
| <i>Bidens bipinnata</i> L.                            | **                  | Beggartick              | A  | NV | Asteraceae    | D   | H  | Th   | Mes |
| <i>Bistorta amplexicaulis</i> (D.Don) Green           | Tarva panra/Anjabar | Red bistort             | P  | NV | Polygonaceae  | D   | H  | Th   | N   |
| <i>Brachypodium retusum</i> (Pers.) P. Beauv.         | **                  | **                      | P  | NV | Poaceae       | M   | H  | H    | N   |
| <i>Brassica campestris</i> (L.) Clapham               | Sharhsham/Sarson    | Mustard                 | A  | NV | Brassicaceae  | D   | H  | Megp | Mic |
| <i>Brassica nigra</i>                                 | Toor sharsham       | Black mustard           | A  | CU | Brassicaceae  | D   | H  | Th   | N   |
| <i>Broussonetia papyrifera</i> (L.) Vent.             | Gultoot             | paper mulberry          | P  | N  | Moraceae      | D   | T  | Th   | N   |
| <i>Calendula arvensis</i> L.                          | Ziargulay           | Marigold                | A  | I  | Asteraceae    | D   | H  | Th   | Mic |
| <i>Cannabis sativa</i> L.                             | Bhang/Merijwana     | Hemp                    | A  | I  | Cannabaceae   | D   | H  | Th   | Mic |
| <i>Calotropis procera</i> (Aiton) W.T.Aiton           | Spalmai             | Apple of Sodom          | P  | NV | Companudaceae | D   | S  | Th   | Mic |
| <i>Carthamus lanatus</i> L.                           | Shaldana Ghana      | Woolly distaff thistle  | A  | NV | Asteraceae    | D   | H  | Np   | Mes |
| <i>Carthamus oxyacantha</i> Bieb.                     | Kareza/Pohli        | Distaff thistles        | A  | N  | Asteraceae    | D   | H  | Np   | Mes |
| <i>Cedrus deodara</i> (Roxb. ex D. Don) G. Don        | Diyar               | Cedar                   | P  | NV | Pinaceae      | **  | T  | Th   | Mic |
| <i>Celtis caucasica</i> Willd.                        | Tagha               | Hackberries             | P  | NV | Ulmaceae      | D   | T  | Th   | Mic |

|                                                     |                  |                           |     |    |                 |    |   |      |     |
|-----------------------------------------------------|------------------|---------------------------|-----|----|-----------------|----|---|------|-----|
| <i>Cenchrus americanus</i> (L.) Morrone             | Bajra            | Pearl millet              | A   | NV | Poaceae         | M  | H | Th   | Mic |
| <i>Centaurea cyanus</i> L.                          | Gul Tokna        | Cornflower                | A   | N  | Asteraceae      | D  | H | Th   | Mic |
| <i>Chenopodium album</i> Linn.                      | Sarme            | Goose foot                | A   | NV | Amaranthaceae   | D  | H | Th   | Mes |
| <i>Chenopodium ambrosioides</i> L.                  | Binnakai         | Worm seed                 | A/P | NV | Amaranthaceae   | D  | H | Th   | Mic |
| <i>Chrozophora tinctoria</i> (L.) Raf.              | **               | Dyer's croton             | A/P | NV | Euphorboaceae   | D  | H | Megp | N   |
| <i>Cirsium arvense</i> (L.) Scop.                   | Kandai           | Creeping thistle          | P   | NV | Asteraceae      | D  | H | Th   | Mic |
| <i>Citrullus lanatus</i> (Thunb.) Mats. & Nakai.    | Hindwana         | Watermelon                | A   | CU | Cucurbitaceae   | D  | H | G    | N   |
| <i>Citrus limon</i> (L.) Osbeck.                    | Nimbo            | Lemon                     | P   | NV | Rutaceae        | D  | T | Th   | Mic |
| <i>Cleome viscosa</i> L.                            | **               | Asian spiderflower        | A   | NV | Capparidaceae   | D  | H | Th   | Mes |
| <i>Clinopodium vulgare</i> L.                       | Kamasla Pudina   | Wild basil                | P   | NV | Lamiaceae       | D  | H | Th   | N   |
| <i>Colocasia esculenta</i> (L.) Schott              | Kachalo          | Kalo                      | A   | CU | Araceae         | M  | H | H    | Mes |
| <i>Corynephorus canescens</i> (L.) P. Beauv.        | Sharghashay      | Grey hair-grass           | A   | NV | Poaceae         | M  | H | Np   | Mic |
| <i>Cucumis melo</i> L. ssp. <i>agrestis</i> (Naud.) | Khatakay         | Melon                     | A   | W  | Cucurbitaceae   | D  | H | Th   | Mic |
| <i>Cucumis sativus</i> L.                           | Badrang          | Cucumber                  | A   | CU | Cucurbitaceae   | D  | H | Hc   | N   |
| <i>Cucurbita pepo</i> L.                            | Kado             | Pumpkin                   | A   | CU | Compositae      | D  | C | G    | N   |
| <i>Cuscuta reflexa</i> Roxb.                        | Prewatay         | Giant dodder              | P   | NV | Cuscutaceae     | D  | H | G    | Mic |
| <i>Cymbopogon jwarancusa</i> (Jones) Schult.        | **               | Oil grass                 | P   | NV | Poaceae         | M  | H | G    | Mic |
| <i>Cynodon dactylon</i> (L.)                        | Kabal            | Grass                     | P   | NV | Poaceae         | M  | H | H    | N   |
| <i>Cyperus cyperoides</i> (L.) Kuntze.              | **               | Pacific island flat sedge | P   | W  | Cyperaceae      | M  | H | H    | N   |
| <i>Cyperus glomeratus</i> L.                        | **               | Umbrella Grass            | P   | W  | Cyperaceae      | M  | H | H    | N   |
| <i>Cyperus iria</i> L.                              | **               | Rice flat sedge           | A   | W  | Cyperaceae      | M  | H | Th   | Mes |
| <i>Cyperus rotundus</i> L.                          | Dela             | Nut grass                 | P   | W  | Cyperaceae      | M  | H | Mesp | Mes |
| <i>Datura metal</i> L.                              | Dhatara          | Thorn apple               | A/B | I  | Solanaceae      | D  | H | Mesp | Mes |
| <i>Desmostachya bipinnata</i> (L.) Stapf.           | **               | **                        | P   | NV | Poaceae         | M  | H | Th   | N   |
| <i>Digitaria sanguinalis</i> (L.) Scop.             | **               | Hairy crabgrass           | A   | NV | Gramineae       | M  | H | Micp | Mic |
| <i>Diospyros lotus</i> L.                           | Toor amlook      | Date-plum                 | P   | NV | Ebenaceae       | D  | T | Th   | Mac |
| <i>Dodonaea viscosa</i> (L.) Jacq.                  | Ghwaraskay       | Hop Bush                  | P   | NV | Sapindaceae     | D  | S | Th   | Mac |
| <i>Dryopteris juxtaposita</i> H. Christ             | Kwanjey          | Wood fern                 | P   | NV | Dryopteridaceae | ** | H | Th   | N   |
| <i>Duchesnea indica</i> (Andr.) Focke               | Zmake toot/Kolal | Mock strawberry           | P   | NV | Rosaceae        | D  | H | Th   | N   |
| <i>Dysphania botrys</i> (L.) Mosyakin & Clemants.   | Sarmey           | Goose foot                | A   | I  | Amaranthaceae   | D  | H | Np   | Mes |
| <i>Eclipta prostrata</i> (L.) L.                    | **               | False daisy               | A   | NV | Compositae      | D  | H | Megp | L   |
| <i>Eleusine indica</i> (L.) Gaertn.                 | **               | Indian goosegrass         | A   | W  | Poaceae         | M  | H | Th   | Mic |
| <i>Epilobium angustifolium</i> L.                   | **               | Fireweed                  | P   | IN | Onagraceae      | D  | H | Th   | Mes |
| <i>Epilobium hirsutum</i> L.                        | **               | Great willowherb          | P   | NV | Onagraceae      | D  | H | Th   | Mic |
| <i>Epilobium tetragonum</i> L.                      | **               | Square stalked willow     | P   | IN | Onagraceae      | D  | H | Megp | Meg |
| <i>Equisetum arvensis</i> L.                        | Bandakay         | Field horsetail           | P   | NV | Equistaceae     | ** | H | G    | N   |
| <i>Erigeron Canadensis</i> (L.) Cronq.              | Maloch           | Horseweed                 | A   | NV | Asteraceae      | D  | H | H    | Mes |
| <i>Erigeron trilobus</i> (Decne.) Boiss.            | **               | Fleabane                  | A   | NV | Asteraceae      | D  | H | Th   | Mic |
| <i>Eriophorum comosum</i> (Wall.) Nees              | **               | **                        | P   | NV | Cyperaceae      | M  | H | Th   | N   |

|                                                  |                    |                        |     |    |               |    |   |      |     |
|--------------------------------------------------|--------------------|------------------------|-----|----|---------------|----|---|------|-----|
| <i>Eryngium coeruleum</i> M-Bieb.                | Manzari panja      | Eryngo                 | A/P | NV | Apiaceae      | D  | H | Th   | Meg |
| <i>Eucalyptus lanceolatus</i> DC.                | Lachi              | Eucalyptus             | P   | ID | Myrtaceae     | D  | T | G    | Mes |
| <i>Eulaliopsis binata</i> (Retz.) C.E. Hubb.     | **                 | Sabaigrass             | P   | NV | Poaceae       | M  | H | H    | Mic |
| <i>Ferula northex</i> L.                         | **                 | Giant fennel           | P   | N  | Apiaceae      | D  | T | Th   | N   |
| <i>Festuca gigantea</i> (L.) Vill.               | Brang Ghia         | Giant fescue           | P   | N  | Poaceae       | M  | H | H    | Mes |
| <i>Ficus carica</i> L.                           | Injeer             | Fig                    | P   | NV | Moraceae      | D  | T | H    | Mic |
| <i>Fragaria vesca</i> L.                         | **                 | Alpine strawberry      | P   | NV | Rosaceae      | D  | H | Th   | Mic |
| <i>Geranium wallichianum</i> D. Don ex sweet     | Sra zeal           | Buxton's blue          | P   | NV | Gentianaceae  | D  | H | H    | Mic |
| <i>Helianthus annus</i> L.                       | Nwar paras         | Sun flower             | P   | CA | Asteraceae    | D  | H | Np   | N   |
| <i>Hippophea rhamnoides</i> L.                   | **                 | Sea-buckthorn          | P   | N  | Elaeagnaceae  | D  | S | H    | N   |
| <i>Impatiens bicolor</i> Royle.                  | **                 |                        | P   | NV | Balsaminaceae | D  | H | NP   | N   |
| <i>Indigofera heterantha</i> Wall. ex Brandis    | Ghoreja            | Himalayan indigo       | P   | NV | Papilionaceae | D  | S | Th   | N   |
| <i>Juglans regia</i> L.                          | Ghuz               | Walnut                 | P   | N  | Juglandaceae  | D  | T | G    | N   |
| <i>Juncus articulatus</i> L.                     | **                 | Jointleaf rush         | P   | NV | Juncaceae     | M  | H | H    | N   |
| <i>Justicia adhatoda</i> L.                      | Baikar             | Adhatoda               | P   | NV | Acanthaceae   | D  | S | Th   | Mic |
| <i>Lactuca serriola</i> L.                       | Zangali salad      | Prickly lettuce        | A   | NV | Asteraceae    | D  | H | Th   | Mes |
| <i>Lagerstroemia indicana</i> (L.) Pers.         | **                 | Crape myrtle           | P   | CU | Lythraceae    | D  | T | Th   | Mic |
| <i>Lantana camara</i> L.                         | **                 | Big-sage               | P   | W  | Verbenaceae   | D  | S | Th   | N   |
| <i>Lepidium pinnatifidum</i> Ledeb.              | **                 | Featherleaf pepperweed | A   | NV | Brassicaceae  | D  | H | Np   | Mes |
| <i>Lepidium sativum</i> L.                       | Halam              | Garden cress           | A   | CU | Brassicaceae  | D  | H | G    | Mes |
| <i>Leucas cephalotes</i> (Roth.) Spreng.         | **                 | Spiderwort             | A   | W  | Lamiaceae     | D  | H | Th   | Mic |
| <i>Luffa acutangula</i> (L.) Roxb.               | Torai              | Angled luffa           | A   | CU | Cucurbitaceae | D  | H | Th   | N   |
| <i>Lycopersicon esculentum</i> Mill.             | Tamatar            | Tomato                 | A   | CU | Solanaceae    | D  | H | Th   | Mes |
| <i>Lycopus europaeus</i> L.                      | Da Jabey Seazonkay | Gypsywort              | A   | NV | Lamiaceae     | D  | H | Th   | Mac |
| <i>Mallotus philippinensis</i> Muell.            | Kambela            | Kamala                 | P   | NV | Euphorbiaceae | D  | S | Th   | Mes |
| <i>Malva sylvestris</i> L.                       | Sonchal            | Mallow                 | A   | I  | Malvaceae     | D  | H | Th   | Mic |
| <i>Malvastrum coromandelianum</i> (L.) Gracke    | **                 | False mallow.          | A   | NV | Malvaceae     | D  | H | Th   | Mic |
| <i>Marrubium vulgare</i> L.                      | **                 | White horehound        | P   | NV | Lamiaceae     | D  | H | Th   | N   |
| <i>Marsilea quadrifolia</i> L.                   | **                 | Water Clover           | P   | NV | Marsileaceae  | ** | H | Ch   | N   |
| <i>Maytenus royleanus</i> (Wall. ex Lawson) Cuf. | Sor azghay         | Milkweed               | P   | NV | Celastraceae  | D  | S | H    | Mes |
| <i>Medicago denticulata</i> Willd.               | Speeshtarey        | Medick                 | A   | NV | Fabaceae      | D  | H | Th   | Mic |
| <i>Melia azedarach</i> L.                        | Neem               | Lilac                  | P   | NV | Meliaceae     | D  | T | Mesp | Mes |
| <i>Mentha longifolia</i> (L.) Huds               | Wenaley            | Peppermint             | P   | NV | Lamiaceae     | D  | H | H    | Mes |
| <i>Mentha veridus</i> (L.) L.                    | Podina             | Garden mint            | P   | EX | Lamiaceae     | D  | H | H    | N   |
| <i>Mirabilis jalapa</i> L.                       | Gul bada           | Japanese 4 'o' clock   | A   | N  | Nyctaginaceae | D  | H | H    | N   |
| <i>Monothea buxifolia</i> (Falc.) A. DC.         | Gurgura            | **                     | P   | NV | Sapotaceae    | D  | T | H    | L   |
| <i>Morus alba</i> L.                             | Spin Tut           | Mulberry               | P   | I  | Moraceae      | D  | T | Micp | Mes |
| <i>Morus nigra</i> L.                            | Toor toot          | Black mulberry         | P   | NV | Moraceae      | D  | T | Megp | Mic |
| <i>Nasturtium officinale</i> R. Br. in Aiton.    | Talmira            | Water Cress            | P   | NV | Brassicaceae  | D  | H | Micp | Mes |

|                                                   |                 |                         |       |    |                  |    |   |      |     |
|---------------------------------------------------|-----------------|-------------------------|-------|----|------------------|----|---|------|-----|
| <i>Nerium oleander</i> L.                         | Ganderay        | Nerium                  | P     | NV | Apocynaceae      | D  | S | Megp | Mic |
| <i>Olea ferruginea</i> Royle.                     | Khona           | Kahu                    | P     | NV | Oleaceae         | D  | T | Np   | N   |
| <i>Onychium contiguum</i> Wall. ex C. Hope        | **              | Carrot Fern plant       | P     | NV | Adiantaceae      | ** | H | Micp | Mic |
| <i>Oryza sativa</i> L.                            | Shooley         | Asian rice              | A     | CU | Poaceae          | M  | H | Megp | Mic |
| <i>Otostegia limbata</i> (Benth.)                 | Spin azghay     | Chotta kanda            | P     | NV | Lamiaceae        | D  | S | Th   | Mac |
| <i>Oxalis corniculata</i> L.                      | Tarukey         | Creeping woodsorrel     | A     | NV | Oxalidaceae      | D  | H | Ch   | Mac |
| <i>Panicum antidotale</i> Retz.                   | Ghirri          | Blue panicum            | P     | N  | Poaceae          | M  | H | H    | L   |
| <i>Parrotiopsis jacquemontiana</i> (Dcne.) Rehder | **              | **                      | P     | NV | Hammelidaceae    | D  | T | Megp | Mes |
| <i>Parthenium hysterophorus</i> L.                | Carrot grass    | White top               | A     | I  | Asteraceae       | D  | H | Np   | Mic |
| <i>Paspalum distichum</i> L.                      | -----           | Knotgrass               | P     | N  | Papilionaceae    | M  | H | H    | N   |
| <i>Persicaria hydropiper</i> (L.) Delarbre.       | Soor palpulak   | Water pepper,           | A     | NV | Polygonaceae     | D  | H | Th   | Mic |
| <i>Phoenix dactylifera</i> L.                     | Kajora          | Date                    | P     | CU | Arecaceae        | D  | T | Th   | Mic |
| <i>Phragmites australis</i> (Cay.) Trin. ex Steud | **              | Common reed             | P     | NV | Poaceae          | M  | H | H    | N   |
| <i>Pinus roxburghii</i> Sargent.                  | Nakhtar         | Chir pine               | P     | NV | Pinaceae         | ** | T | Mesp | Mic |
| <i>Pinus wallichiana</i> A. B. Jackson            | Peoch           | Blue pine               | P     | NV | Pinaceae         | ** | T | Th   | Mes |
| <i>Plantago lanceolata</i> L.                     | Asphagol        | Ribwort plantain        | A     | W  | Plantaginaceae   | D  | H | Th   | Mes |
| <i>Plantago major</i> L.                          | Jabai           | **                      | P     | NV | Plantaginaceae   | M  | H | Ch   | L   |
| <i>Polygonum aviculare</i> L.                     | Bandakai        | Prostrate knotweed      | A     | NV | Polygonaceae     | D  | H | NP   | Mac |
| <i>Populus nigra</i> L.                           | Ghat Speerdar   | Black poplar            | P     | N  | Salicaceae       | D  | T | G    | N   |
| <i>Portulaca oleracea</i> L.                      | Warkhary        | Duckweed                | A     | N  | Portulacaceae    | D  | H | G    | Meg |
| <i>Potentilla indica</i> (Andrews)                | Da zamaki toot  | Indian strawberry       | P     | NV | Rosaceae         | D  | H | Th   | Mic |
| <i>Potentilla reptans</i> L.                      |                 | Creeping cinquefoil     | P     | N  | Rosaceae         | D  | H | Megp | Mes |
| <i>Praecitrullus fistulosus</i> (Stocks) Pangalo. | Tinda           | Indian squash           | A     | CU | Cucurbitaceae    | D  | H | Th   | Mic |
| <i>Pteridium aquilinum</i> (L.) Kuhn              | **              | Eagle fern              | P     | NV | Dennstaedtiaceae | D  | H | Mesp | Mic |
| <i>Pteris cretica</i> L.                          | **              | Cretan brake            | P     | NV | Pteridaceae      | ** | H | Th   | Mes |
| <i>Pteris vittata</i> L.                          | **              | Chinese brake           | P     | NV | Pteridaceae      | ** | H | Th   | N   |
| <i>Punica granatum</i> L.                         | Zangaly anar    | Pomegranate             | P     | CU | Lythraceae       | D  | S | Np   | L   |
| <i>Quercus baloot</i> Griffth.                    | Serhai/Breh     | Holm oak                | P     | NV | Fagaceae         | D  | T | Th   | Mic |
| <i>Quercus dilatata</i> Royle.                    | Banj            | Oak                     | P     | NV | Fagaceae         | D  | T | Th   | Mic |
| <i>Ranunculus arvensis</i> L.                     | Kach Ziarhgulay | Corn buttercup          | A     | W  | Ranunculaceae    | D  | H | H    | N   |
| <i>Ranunculus muricatus</i> L.                    | Marchakay       | Rough-fruited buttercup | A/B/P | W  | Ranunculaceae    | D  | H | Th   | Mac |
| <i>Ranunculus sceleratus</i> L.                   | **              | Celery-leaved buttercup | A     | NV | Ranunculaceae    | D  | H | Th   | Mes |
| <i>Rhamnus triquetra</i> (Wall.) Brandis          | Battal          | **                      | P     | NV | Rhamnaceae       | D  | T | Th   | Mac |
| <i>Ricinus communis</i> L.                        | Harhanda        | Castor bean             | P     | NV | Euphorbiaceae    | D  | S | H    | N   |
| <i>Rosa moschata</i> Herm.                        | Zangali gulab   | **                      | P     | NV | Rosaceae         | D  | S | Mesp | Mic |
| <i>Rumex dentatus</i> L.                          | Shalkhey        | Toothed dock            | A     | W  | Polygonaceae     | D  | H | Th   | Mic |
| <i>Rumex hastatus</i> D. Don                      | Trewakay        | Heartwing sorrel        | P     | NV | Polygonaceae     | D  | H | Th   | Mes |
| <i>Saccharum bengalensis</i> Retz.                | **              | Munj sweetcane          | A/P   | N  | Poaceae          | M  | H | Th   | Mic |
| <i>Sagittaria trifolia</i> L.                     | **              | Three leaf arrowhead    | A     | NV | Alismataceae     | M  | H | H    | Mes |

|                                                 |                    |                         |   |    |                  |   |   |      |     |
|-------------------------------------------------|--------------------|-------------------------|---|----|------------------|---|---|------|-----|
| <i>Salix babylonica</i> L.                      | Tita Wala          | Weeping willow          | P | NV | Salicaceae       | D | T | Th   | Mic |
| <i>Salix alba</i> L.                            | Wula               | Willow                  | P | NV | Salicaceae       | D | T | Th   | Mic |
| <i>Salvia moorcroftiana</i> Wall. ex Benth.     | Kharghwag          | Kaljari                 | P | NV | Lamiaceae        | D | H | H    | N   |
| <i>Sambucus nigra</i> L.                        | **                 | European elderberry     | P | CU | Caprifoliaceae   | D | T | Th   | N   |
| <i>Sambucus wightiana</i> Wall. ex Wight & Arn. | **                 | Gandala                 | P | W  | Sambucaceae      | D | S | Ch   | Mic |
| <i>Senecio chrysanthemoides</i> DC.             | Kalay di Jar       | **                      | P | NV | Asteraceae       | D | H | Th   | Mic |
| <i>Setaria viridis</i> (L.) P.Beauv.            | **                 | Green foxtail           | A | W  | Poaceae          | M | H | Th   | Mic |
| <i>Solanum nigrum</i> L.                        | Kachmcho           | Black nightshade        | A | N  | Solanaceae       | D | H | Th   | Mes |
| <i>Solanum surattense</i> Burm. f.              | Maraghony          | Yellow-fruit nightshade | P | NV | Solanaceae       | D | H | Th   | Mic |
| <i>Sonchus arvensis</i> L.                      | **                 | The field milk thistle  | P | NV | Asteraceae       | D | H | H    | Mic |
| <i>Sonchus asper</i> (L.) Hill                  | Shodapay           | Prickly sow-thistle     | A | N  | Asteraceae       | D | H | Th   | Mic |
| <i>Sorbaria tomentosa</i> (Lindl.) Rehr         | **                 | false spiraea           | P | NV | Rosaceae         | D | S | H    | L   |
| <i>Sorghum bicolor</i> (L.) Moench.             | Khanjara           | Great millet            | A | CU | Poaceae          | M | H | G    | Mes |
| <i>Stellaria media</i> (L.) Vill.               | Char kulma         | Chickweed               | A | CO | Caryophyllaceae  | D | H | Megp | N   |
| <i>Tagetes minuta</i> L.                        | Hamesha            | Wild marigold           | A | I  | Asteraceae       | D | H | Megp | N   |
| <i>Tamarix aphyll</i> (L.) Karst.               | Ghaz               | Salt cedar              | P | N  | Temaricaceae     | D | T | Th   | Mic |
| <i>Taraxacum officinale</i> F.H. Wigg           | Ziar Gulae         | Common dandelion        | P | NV | Asteraceae       | D | H | Th   | Mes |
| <i>Trianthema portulacastrum</i> L.             | Insut              | Desert horsepurslane    | A | W  | Aizoaceae        | D | H | Th   | Mes |
| <i>Tribulus terrestris</i> L.                   | Markundai          | Cat's-head              | A | N  | Zygophyllaceae   | D | H | Th   | Mes |
| <i>Typha domingensis</i> Pers.                  | **                 | Cattail                 | P | NV | Typhaceae        | M | H | Np   | Mes |
| <i>Typha latifolia</i> L.                       | Lokha              | Broadleaf cattail       | P | NV | Typhaceae        | M | H | Np   | Mic |
| <i>Urtica dioca</i> L.                          | Sezonki/Jalbang    | Common nettle           | P | NV | Urticaceae       | D | H | G    | Mes |
| <i>Verbascum Thapsus</i> L.                     | Khar Gwag          | Jangli Tamak            | B | NV | Scrophulariaceae | D | H | Th   | Mic |
| <i>Verbena officinalis</i> L.                   | Shamakay           | Common vervain          | P | W  | Verbenaceae      | D | H | H    | Mic |
| <i>Verbesina encelioides</i> (Cav.)             | Zangaly Nwarparast | Wild sunflower          | A | N  | Asteraceae       | D | H | Megp | L   |
| <i>Vitex negundo</i> L.                         | Marwandai          | Chinese chaste tree     | P | ID | Verbenaceae      | D | S | H    | Mic |
| <i>Withania somnifera</i> (L.) Dunal            | Kotilal            | Ashwagandha             | P | NV | Solanaceae       | D | H | Th   | Mic |
| <i>Xanthium spinosum</i> L.                     | Geshke/Jeshke      | Spiny cocklebur         | A | I  | Asteraceae       | D | H | P    | Ap  |
| <i>Xanthium strumarium</i> L.                   | Geshke/Jeshke      | Clothbur                | A | I  | Asteraceae       | D | H | G    | N   |
| <i>Zanthoxylum armatum</i> DC.                  | Dambara            | Winged prickly ash      | P | NV | Rutaceae         | D | S | G    | N   |
| <i>Zea mays</i> L.                              | Jawar              | Corn                    | A | CU | Poaceae          | M | H | H    | Mic |
| <i>Ziziphus nummularia</i> Mill.                | Karkanrah          | Jujube bush             | P | NV | Rhamnaceae       | D | S | Th   | N   |
| <i>Ziziphus oxyphylla</i> Edgew.                | Enalay             | Took Bari               | P | NV | Vitaceae         | D | S | Th   | Mes |

Note: LS-life span, SP-Status in Pakistan, M-monocot, D-dicot, H-habit, NC-native country, RLF- Raunkier life form, LSC-leaf size class, PC-plant code, I-invasive, NV-native, CU- cultivated, N-naturalized, CA-casual, W-weed, IN-introduced, ID-indigenous, EX-exotic, CO-cosmopolitans. M-monocot, D-dicot HB-habit, H-herb, S-shrub, T-tree, C-climber A-annual, B-biennial, P-perennial, RLF-raunkier life form, LSC-leaf size class, (Life form) G-geophyte, Th-Therophyte, H-Hemicryptophyte, Ch-Chamaephyte, Np-Nanophanerophyte, Micp- Microphanerophyte, Mesp-Mesophanerophyte, Megp Megaphanerophyte, P-Parasite. (Leaf form) Ap-Aphyllous, L-Leptophyll, N-Nanophyll, Mic-Microphyll, Mes-Mesophyll, Mac-Macrophyll, Meg-Megaphyll): \*\* (represents absence of an attribute).

**Table S2:** showing the IVI and Mean Standard error of 186 plant species found in both mining (Group I) and non-mining sites (Group II)

| PC    | Mining sites                                  |           | Non-mining sites                              |           |
|-------|-----------------------------------------------|-----------|-----------------------------------------------|-----------|
|       | Plant Name                                    | M±SE      | Plant Name                                    | M±SE      |
| Cans  | <i>Cannabis sativa</i> L.                     | 2.7±0.87  | <i>Cannabis sativa</i> L.                     | 4.65±1.28 |
| Mora  | <i>Morus alba</i> L.                          | 1.43±0.58 | <i>Morus alba</i> L.                          | 1.33±0.61 |
| Jusa  | <i>Justicia adhatoda</i> L.                   | **        | <i>Justicia adhatoda</i> L.                   | 0.74±0.74 |
| Corc  | <i>Corynephorus canescens</i> (L.) P. Beauv.  | 2.52±1.22 | <i>Corynephorus canescens</i> (L.) P. Beauv.  | 2.13±1.18 |
| Br cr | <i>Brachypodium retusum</i> (Pers.) P. Beauv. | **        | <i>Brachypodium retusum</i> (Pers.) P. Beauv. | 1±0.67    |
| Otol  | <i>Otostegia limbata</i> (Benth.)             | **        | <i>Otostegia limbata</i> (Benth.)             | 0.94±0.68 |
| Dodv  | <i>Dodonaea viscosa</i> (L.) Jacq.            | 0.67±0.47 | <i>Dodonaea viscosa</i> (L.) Jacq.            | 2.1±1.43  |
| Cynd  | <i>Cynodon dactylon</i> (L.)                  | 4.52±0.70 | <i>Cynodon dactylon</i> (L.)                  | 2.8±0.94  |
| Monb  | <i>Monothea buxifolia</i> (Falc.) A. DC.      | **        | <i>Monothea buxifolia</i> (Falc.) A. DC.      | 1.86±1.15 |
| Ficc  | <i>Ficus carica</i> L.                        | 0.61±0.48 | <i>Ficus carica</i> L.                        | 1.62±0.71 |
| Rumd  | <i>Rumex dentatus</i> L.                      | 1.96±1.23 | <i>Rumex dentatus</i> L.                      | 1.68±0.49 |
| Oxac  | <i>Oxalis corniculata</i> L.                  | 1.71±0.43 | <i>Oxalis corniculata</i> L.                  | 1.35±0.63 |
| Xans  | <i>Xanthium strumarium</i> L.                 | 4.23±1.12 | <i>Xanthium strumarium</i> L.                 | 2.17±0.93 |
| Aila  | <i>Ailanthus altissima</i> (Mill.) Swingle    | 1.4±0.48  | <i>Ailanthus altissima</i> (Mill.) Swingle    | 1.42±0.64 |
| Lyce  | <i>Lycopersicon esculentum</i> Mill.          | 0.14±0.14 | <i>Lycopersicon esculentum</i> Mill.          | 0.25±0.17 |
| Acam  | <i>Acacia modesta</i> Wall.                   | 0.24±0.24 | <i>Acacia modesta</i> Wall.                   | 1.2±0.81  |
| Hela  | <i>Helianthus annuus</i> L.                   | 2.22±1.01 | <i>Helianthus annuus</i> L.                   | 0.51±0.38 |
| Pinr  | <i>Pinus roxburghii</i> Sargent.              | 0.23±0.23 | <i>Pinus roxburghii</i> Sargent.              | 2.86±1.23 |
| Acan  | <i>Acacia nilotica</i> (L.) Delile            | 0.5±0.5   | <i>Acacia nilotica</i> (L.) Delile            | 1.02±0.70 |
| Olef  | <i>Olea ferruginea</i> Royle.                 | 0.40±0.28 | <i>Olea ferruginea</i> Royle.                 | 2.21±1.12 |
| Ar tm | <i>Artemisia vulgaris</i> L.                  | **        | <i>Artemisia vulgaris</i> L.                  | 0.13±0.13 |
| Avir  | <i>Amaranthus viridis</i> L.                  | 0.92±0.42 | <i>Amaranthus viridis</i> L.                  | 1±0.48    |
| Polr  | <i>Portulaca oleracea</i> L.                  | **        | <i>Portulaca oleracea</i> L.                  | 0.7±0.38  |
| Apng  | <i>Alternanthera pungens</i> Kunth.           | 0.2±0.2   | <i>Alternanthera pungens</i> Kunth.           | 1.27±0.90 |
| Dysa  | <i>Chenopodium ambrosioides</i> L.            | 1.99±0.64 | <i>Chenopodium ambrosioides</i> L.            | 1.28±0.60 |
| Ertr  | <i>Erigeron trilobus</i> (Decne.) Boiss.      | 0.78±0.45 | <i>Erigeron trilobus</i> (Decne.) Boiss.      | 0.3±0.21  |
| Ecor  | <i>Eryngium coeruleum</i> M-Bieb.             | **        | <i>Eryngium coeruleum</i> M-Bieb.             | 0.43±0.43 |
| Eucl  | <i>Eucalyptus lanceolatus</i> DC.             | 0.67±0.46 | <i>Eucalyptus lanceolatus</i> DC.             | 0.32±0.21 |
| Carl  | <i>Carthamus lanatus</i> L.                   | 0.23±0.23 | <i>Carthamus lanatus</i> L.                   | 0.62±0.42 |
| Vere  | <i>Verbesina encelioides</i> (Cav.)           | 1.77±0.86 | <i>Verbesina encelioides</i> (Cav.)           | 1.57±0.75 |
| Lepv  | <i>Lepidium sativum</i> L.                    | 0.7±0.57  | <i>Lepidium sativum</i> L.                    | 0.45±0.24 |
| Caro  | <i>Carthamus oxyacantha</i> Bieb.             | 0.52±0.52 | <i>Carthamus oxyacantha</i> Bieb.             | 0.15±0.15 |
| Vtxn  | <i>Vitex negundo</i> L.                       | 0.79±0.79 | <i>Vitex negundo</i> L.                       | **        |
| Cltp  | <i>Calotropis procera</i> (Aiton) W.T.Aiton   | 1.15±0.75 | <i>Calotropis procera</i> (Aiton) W.T.Aiton   | **        |
| Desb  | <i>Desmostachya bipinnata</i> (L.) Stapf.     | 1.5±0.69  | <i>Desmostachya bipinnata</i> (L.) Stapf.     | 1.18±0.75 |
| Chrz  | <i>Chrozophora tinctoria</i> (L.) Raf.        | 1.28±0.61 | <i>Chrozophora tinctoria</i> (L.) Raf.        | 0.93±0.93 |
| Cntm  | <i>Centaurea cyanus</i> L.                    | 1.08±0.58 | <i>Centaurea cyanus</i> L.                    | 0.63±0.63 |
| Parh  | <i>Parthenium hysterophorus</i> L.            | 1.37±0.70 | <i>Parthenium hysterophorus</i> L.            | 0.92±0.77 |
| Dmtl  | <i>Datura metal</i> L.                        | 2.07±0.86 | <i>Datura metal</i> L.                        | 0.38±0.38 |
| Chnp  | <i>Chenopodium album</i> Linn.                | 0.40±0.40 | <i>Chenopodium album</i> Linn.                | 0.9±0.49  |
| Mlaz  | <i>Melia azedarach</i> L.                     | 0.25±0.25 | <i>Melia azedarach</i> L.                     | 1.00±0.57 |
| Urtd  | <i>Urtica dioca</i> L.                        | 1.39±0.64 | <i>Urtica dioca</i> L.                        | 0.81±0.48 |
| Mlng  | <i>Mentha longifolia</i> (L.) Huds            | 3.12±0.91 | <i>Mentha longifolia</i> (L.) Huds            | 0.65±0.47 |
| Carn  | <i>Cirsium arvense</i> (L.) Scop.             | 2.4±0.73  | <i>Cirsium arvense</i> (L.) Scop.             | 1.88±0.67 |
| Phdr  | <i>Persicaria hydropiper</i> (L.) Delarbre.   | 2.06±0.74 | <i>Persicaria hydropiper</i> (L.) Delarbre.   | 1.38±0.75 |
| Mdnt  | <i>Medicago denticulata</i> Willd.            | 0.51±0.41 | <i>Medicago denticulata</i> Willd.            | 0.67±0.48 |
| Tlrf  | <i>Typha latifolia</i> L.                     | 1.54±1.09 | <i>Typha latifolia</i> L.                     | 0.37±0.26 |
| Mroy  | <i>Maytenus royleanus</i> (Wall. ex Lawson)   | 1.02±0.48 | <i>Maytenus royleanus</i> (Wall. ex Lawson)   | 0.63±0.47 |
|       | Cuf.                                          |           | Cuf.                                          |           |
| Mplp  | <i>Mallotus philippinensis</i> Muell.         | **        | <i>Mallotus philippinensis</i> Muell.         | 0.69±0.69 |
| Pdis  | <i>Paspalum distichum</i> L.                  | 0.3±0.3   | <i>Paspalum distichum</i> L.                  | 0.21±0.21 |

|      |                                                                                          |           |                                                                                          |           |
|------|------------------------------------------------------------------------------------------|-----------|------------------------------------------------------------------------------------------|-----------|
| Crot | <i>Cyperus rotundus</i> L.                                                               | 0.28±0.28 | <i>Cyperus rotundus</i> L.                                                               | 1.34±0.69 |
| Cdif | <i>Cyperus cyperoides</i> (L.) Kuntze.                                                   | **        | <i>Cyperus cyperoides</i> (L.) Kuntze.                                                   | 0.16±0.16 |
| Noff | <i>Nasturtium officinale</i> R. Br. in Aiton.                                            | 0.57±0.39 | <i>Nasturtium officinale</i> R. Br. in Aiton.                                            | 0.50±0.34 |
| Bert | <i>Berula erecta</i> (Huds.) Cov.                                                        | **        | <i>Berula erecta</i> (Huds.) Cov.                                                        | 0.15±0.15 |
| Alsp | <i>Alisma plantago-aquatica</i> L.                                                       | **        | <i>Alisma plantago-aquatica</i> L.                                                       | 0.3±0.20  |
| Marq | <i>Marsilea quadrifolia</i> L.                                                           | 1.22±0.56 | <i>Marsilea quadrifolia</i> L.                                                           | 0.45±0.32 |
| Popn | <i>Populus nigra</i> L.                                                                  | 3.41±0.98 | <i>Populus nigra</i> L.                                                                  | 0.26±0.26 |
| Sala | <i>Salix alba</i> L.                                                                     | 0.64±0.46 | <i>Salix alba</i> L.                                                                     | 0.32±0.21 |
| Salb | <i>Salix babylonica</i> L.                                                               | 1.58±0.76 | <i>Salix babylonica</i> L.                                                               | 0.34±0.23 |
| Tagm | <i>Tagetes minuta</i> L.                                                                 | 2.61±0.72 | <i>Tagetes minuta</i> L.                                                                 | 1.04±0.65 |
| Pncg | <i>Punica granatum</i> L.                                                                | 1.17±0.69 | <i>Punica granatum</i> L.                                                                | **        |
| Cmlo | <i>Cucumis melo</i> L. ssp. <i>agrestis</i> (Naud.) Grebensch. var. <i>agrestis</i> Naud | **        | <i>Cucumis melo</i> L. ssp. <i>agrestis</i> (Naud.) Grebensch. var. <i>agrestis</i> Naud | 0.14±0.14 |
| Ctln | <i>Citrullus lanatus</i> (Thunb.) Mats. & Nakai.                                         | 0.21±0.21 | <i>Citrullus lanatus</i> (Thunb.) Mats. & Nakai.                                         | 0.41±0.29 |
| Pavc | <i>Polygonum aviculare</i> L.                                                            | 0.91±0.54 | <i>Polygonum aviculare</i> L.                                                            | 0.88±0.55 |
| Orza | <i>Oryza sativa</i> L.                                                                   | **        | <i>Oryza sativa</i> L.                                                                   | 0.22±0.22 |
| Mjlp | <i>Mirabilis jalapa</i> L.                                                               | 0.26±0.26 | <i>Mirabilis jalapa</i> L.                                                               | 0.12±0.12 |
| Snig | <i>Sambucus nigra</i> L.                                                                 | 0.13±0.13 | <i>Sambucus nigra</i> L.                                                                 | 0.71±0.54 |
| Sspr | <i>Sonchus asper</i> (L.) Hill                                                           | **        | <i>Sonchus asper</i> (L.) Hill                                                           | 0.39±0.28 |
| Sngr | <i>Solanum nigrum</i> L.                                                                 | 0.6±0.35  | <i>Solanum nigrum</i> L.                                                                 | 0.37±0.20 |
| Mslv | <i>Malva sylvestris</i> L.                                                               | 0.74±0.35 | <i>Malva sylvestris</i> L.                                                               | 0.67±0.35 |
| Bpap | <i>Broussonetia papyrifera</i> (L.) Vent.                                                | 0.6±0.42  | <i>Broussonetia papyrifera</i> (L.) Vent.                                                | 0.12±0.12 |
| Mvir | <i>Mentha veridus</i> (L.) L.                                                            | 0.44±0.44 | <i>Mentha veridus</i> (L.) L.                                                            | 0.2±0.2   |
| Ssrt | <i>Solanum surattense</i> Burm. f.                                                       | 1.28±0.48 | <i>Solanum surattense</i> Burm. f.                                                       | 0.20±0.20 |
| Artf | <i>Amaranthus spinosus</i> L.                                                            | 0.34±0.23 | <i>Amaranthus spinosus</i> L.                                                            | 0.17±0.17 |
| Clmv | <i>Cleome viscosa</i> L.                                                                 | 0.18±0.18 | <i>Cleome viscosa</i> L.                                                                 | **        |
| Vthp | <i>Verbascum Thapsus</i> L.                                                              | 0.15±0.15 | <i>Verbascum Thapsus</i> L.                                                              | **        |
| Sags | <i>Sagittaria trifolia</i> L.                                                            | 1.09±0.44 | <i>Sagittaria trifolia</i> L.                                                            | **        |
| Trsc | <i>Pteris cretica</i> L.                                                                 | 0.13±0.13 | <i>Pteris cretica</i> L.                                                                 | **        |
| Cprs | <i>Cyperus iria</i> L.                                                                   | 0.5±0.5   | <i>Cyperus iria</i> L.                                                                   | 0.34±0.34 |
| Tadm | <i>Typha domingensis</i> Pers.                                                           | 0.19±0.19 | <i>Typha domingensis</i> Pers.                                                           | **        |
| Ajcb | <i>Ajuga bracteosa</i> Wall.ex Benth.                                                    | 0.7±0.49  | <i>Ajuga bracteosa</i> Wall.ex Benth.                                                    | **        |
| Trxo | <i>Taraxacum officinale</i> F.H. Wigg                                                    | **        | <i>Taraxacum officinale</i> F.H. Wigg                                                    | 0.67±0.55 |
| Trsv | <i>Pteris vittata</i> L.                                                                 | **        | <i>Pteris vittata</i> L.                                                                 | 0.27±0.27 |
| Eplh | <i>Epilobium hirsutum</i> L.                                                             | **        | <i>Epilobium hirsutum</i> L.                                                             | 0.13±0.13 |
| Advn | <i>Adiantum venustum</i> D.                                                              | **        | <i>Adiantum venustum</i> D.                                                              | 0.23±0.23 |
| Zizn | <i>Ziziphus nummularia</i> Mill.                                                         | **        | <i>Ziziphus nummularia</i> Mill.                                                         | 0.15±0.15 |
| Dgts | <i>Digitaria sanguinalis</i> (L.) Scop.                                                  | 0.42±0.29 | <i>Digitaria sanguinalis</i> (L.) Scop.                                                  | 0.56±0.38 |
| Racr | <i>Ranunculus sceleratus</i> L.                                                          | 1.20±0.45 | <i>Ranunculus sceleratus</i> L.                                                          | 0.22±0.22 |
| Adcv | <i>Adiantum capillus-veneris</i> L.                                                      | **        | <i>Adiantum capillus-veneris</i> L.                                                      | 0.1±0.1   |
| Gwal | <i>Geranium wallichianum</i> D. Don ex sweet                                             | **        | <i>Geranium wallichianum</i> D. Don ex sweet                                             | 0.34±0.23 |
| Zmay | <i>Zea mays</i> L.                                                                       | **        | <i>Zea mays</i> L.                                                                       | 0.09±0.09 |
| Clnv | <i>Clinopodium vulgare</i> L.                                                            | 0.5±0.34  | <i>Clinopodium vulgare</i> L.                                                            | 0.23±0.23 |
| Ecan | <i>Erigeron Canadensis</i> (L.) Cronq.                                                   | 0.32±0.32 | <i>Erigeron Canadensis</i> (L.) Cronq.                                                   | 0.11±0.11 |
| Nero | <i>Nerium oleander</i> L.                                                                | 1.77±0.48 | <i>Nerium oleander</i> L.                                                                | 1.62±0.47 |
| Pnxd | <i>Phoenix dactylifera</i> L.                                                            | **        | <i>Phoenix dactylifera</i> L.                                                            | 0.69±0.50 |
| Dbot | <i>Dysphania botrys</i> (L.) Mosyakin & Clemants.                                        | **        | <i>Dysphania botrys</i> (L.) Mosyakin & Clemants.                                        | 0.07±0.07 |
| MLvs | <i>Malvastrum coromandelianum</i> (L.) Gracke                                            | 0.19±0.19 | <i>Malvastrum coromandelianum</i> (L.) Gracke                                            | 0.17±0.17 |
| Pref | <i>Praecitrullus fistulosus</i> (Stocks) Pangalo.                                        | 0.45±0.25 | <i>Praecitrullus fistulosus</i> (Stocks) Pangalo.                                        | 0.68±0.40 |
| Cpep | <i>Cucurbita pepo</i> L.                                                                 | 0.12±0.12 | <i>Cucurbita pepo</i> L.                                                                 | **        |
| Lcts | <i>Lactuca serriola</i> L.                                                               | 0.11±0.11 | <i>Lactuca serriola</i> L.                                                               | **        |
| Aspn | <i>Amaranthus spinosus</i> L.                                                            | 0.11±0.11 | <i>Amaranthus spinosus</i> L.                                                            | **        |
| Lycp | <i>Lycopus europaeus</i> L.                                                              | 0.29±0.19 | <i>Lycopus europaeus</i> L.                                                              | **        |

|      |                                                                 |           |                                                                 |           |
|------|-----------------------------------------------------------------|-----------|-----------------------------------------------------------------|-----------|
| Tpor | <i>Trianthema portulacastrum</i> L.                             | 0.13±0.13 | <i>Trianthema portulacastrum</i> L.                             | **        |
| Rhes | <i>Rumex hastatus</i> D. Don                                    | 0.32±0.32 | <i>Rumex hastatus</i> D. Don                                    | 0.15±0.15 |
| Sbic | <i>Sorghum bicolor</i> (L.) Moench.                             | 0.54±0.37 | <i>Sorghum bicolor</i> (L.) Moench.                             | 0.71±0.71 |
| Pnst | <i>Cenchrus americanus</i> (L.) Morrone                         | 0.28±0.28 | <i>Cenchrus americanus</i> (L.) Morrone                         | **        |
| Alns | <i>Alnus nitida</i> (Spach) Endl.                               | 0.57±0.39 | <i>Alnus nitida</i> (Spach) Endl.                               | **        |
| Dfm  | <i>Dryopteris juxtaoposita</i> H. Christ                        | 0.19±0.19 | <i>Dryopteris juxtaoposita</i> H. Christ                        | **        |
| Cmbp | <i>Cymbopogon jwarancusa</i> (Jones) Schult.                    | 0.19±0.19 | <i>Cymbopogon jwarancusa</i> (Jones) Schult.                    | **        |
| Ellp | <i>Eulaliopsis binata</i> (Retz.) C.E. Hubb.                    | 0.64±0.64 | <i>Eulaliopsis binata</i> (Retz.) C.E. Hubb.                    | 0.70±0.70 |
| Erpc | <i>Eriophorum comosum</i> (Wall.) Nees                          | 0.2±0.2   | <i>Eriophorum comosum</i> (Wall.) Nees                          | **        |
| Xnar | <i>Zanthoxylum armatum</i> DC.                                  | 0.30±0.30 | <i>Zanthoxylum armatum</i> DC.                                  | **        |
| Clts | <i>Celtis caucasica</i> Willd.                                  | 0.2±0.2   | <i>Celtis caucasica</i> Willd.                                  | 0.22±0.22 |
| Ctrs | <i>Citrus limon</i> (L.) Osbeck.                                | 1.04±0.80 | <i>Citrus limon</i> (L.) Osbeck.                                | 1.1±0.79  |
| Lntc | <i>Lantana camara</i> L.                                        | 0.12±0.12 | <i>Lantana camara</i> L.                                        | 0.49±0.49 |
| Rmns | <i>Rhamnus triquetra</i> (Wall.) Brandis                        | 0.43±0.43 | <i>Rhamnus triquetra</i> (Wall.) Brandis                        | **        |
| Lgrs | <i>Lagerstroemia indicant</i> (L.) Pers.                        | 0.5±0.35  | <i>Lagerstroemia indicant</i> (L.) Pers.                        | 0.49±0.49 |
| Zizo | <i>Ziziphus oxyphylla</i> Edgew.                                | 0.16±0.16 | <i>Ziziphus oxyphylla</i> Edgew.                                | **        |
| Slvm | <i>Salvia moorcroftiana</i> Wall. ex Benth.                     | 0.36±0.36 | <i>Salvia moorcroftiana</i> Wall. ex Benth.                     | **        |
| Wths | <i>Withania somnifera</i> (L.) Dunal                            | 1.02±0.58 | <i>Withania somnifera</i> (L.) Dunal                            | **        |
| Equs | <i>Equisetum arvensis</i> L.                                    | 0.12±0.12 | <i>Equisetum arvensis</i> L.                                    | **        |
| Disp | <i>Diospyros lotus</i> L.                                       | 0.19±0.19 | <i>Diospyros lotus</i> L.                                       | 0.37±0.27 |
| Rmsc | <i>Rosa moschata</i> Herrm.                                     | 0.14±0.14 | <i>Rosa moschata</i> Herrm.                                     | 0.40±0.40 |
| pntl | <i>Potentilla reptans</i> L.                                    | **        | <i>Potentilla reptans</i> L.                                    | 0.13±0.13 |
| Achr | <i>Achyranthes aspera</i> L. var. pubescens (Moq.) C.C.Townsend | 0.28±0.28 | <i>Achyranthes aspera</i> L. var. pubescens (Moq.) C.C.Townsend | 0.93±0.54 |
| Sncs | <i>Sonchus arvensis</i> L.                                      | 0.38±0.38 | <i>Sonchus arvensis</i> L.                                      | 0.96±0.61 |
| Eplt | <i>Epilobium tetragonum</i> L.                                  | **        | <i>Epilobium tetragonum</i> L.                                  | 0.11±0.11 |
| Jreg | <i>Juglans regia</i> L.                                         | **        | <i>Juglans regia</i> L.                                         | 0.13±0.13 |
| Xsp  | <i>Xanthium spinosum</i> L.                                     | 0.68±0.48 | <i>Xanthium spinosum</i> L.                                     | 0.80±0.54 |
| AbIm | <i>Abelmoschus esculentus</i> (L.) Moench                       | **        | <i>Abelmoschus esculentus</i> (L.) Moench                       | 0.2±0.2   |
| Aspr | <i>Asparagus officinalis</i> L.                                 | **        | <i>Asparagus officinalis</i> L.                                 | 0.13±0.13 |
| Rcns | <i>Ricinus communis</i> L.                                      | 2.24±0.94 | <i>Ricinus communis</i> L.                                      | 1.27±0.89 |
| Rchi | <i>Ranunculus arvensis</i> L.                                   | 0.46±0.31 | <i>Ranunculus arvensis</i> L.                                   | **        |
| Cesc | <i>Colocasia esculenta</i> (L.) Schott                          | 0.10±0.10 | <i>Colocasia esculenta</i> (L.) Schott                          | 0.33±0.33 |
| Eclp | <i>Eclipta prostrata</i> (L.) L.                                | 0.08±0.08 | <i>Eclipta prostrata</i> (L.) L.                                | **        |
| Morn | <i>Morus nigra</i> L.                                           | 0.40±0.31 | <i>Morus nigra</i> L.                                           | 0.13±0.13 |
| Voff | <i>Verbena officinalis</i> L.                                   | 0.15±0.15 | <i>Verbena officinalis</i> L.                                   | **        |
| Qdlt | <i>Quercus dilatata</i> Royle.                                  | 0.28±0.19 | <i>Quercus dilatata</i> Royle.                                  | 0.2±0.2   |
| Svir | <i>Setaria viridis</i> (L.) P.Beauv.                            | 0.96±0.96 | <i>Setaria viridis</i> (L.) P.Beauv.                            | 0.64±0.64 |
| Bdns | <i>Bidens bipinnata</i> L.                                      | 0.54±0.37 | <i>Bidens bipinnata</i> L.                                      | **        |
| lhtr | <i>Indigofera heterantha</i> Wall. ex Brandis                   | 0.24±0.24 | <i>Indigofera heterantha</i> Wall. ex Brandis                   | **        |
| Lipp | <i>Lepidium pinnatifidum</i> Ledeb.                             | 0.64±0.48 | <i>Lepidium pinnatifidum</i> Ledeb.                             | 0.54±0.54 |
| Bcam | <i>Brassica campestris</i> (L.) Clapham                         | 0.22±0.22 | <i>Brassica campestris</i> (L.) Clapham                         | **        |
| Trbl | <i>Tribulus terrestris</i> L.                                   | **        | <i>Tribulus terrestris</i> L.                                   | 0.31±0.21 |
| Cusa | <i>Cucumis sativus</i> L.                                       | **        | <i>Cucumis sativus</i> L.                                       | 0.46±0.46 |
| Arst | <i>Aristida adscensionis</i> L.                                 | **        | <i>Aristida adscensionis</i> L.                                 | 0.14±0.14 |
| Lact | <i>Luffa acutangula</i> (L.) Roxb.                              | 0.39±0.39 | <i>Luffa acutangula</i> (L.) Roxb.                              | **        |
| Adfm | <i>Adiantum caudatum</i> L.                                     | 0.23±0.23 | <i>Adiantum caudatum</i> L.                                     | **        |
| Qblt | <i>Quercus baloot</i> Griffith.                                 | **        | <i>Quercus baloot</i> Griffith.                                 | 0.3±0.3   |
| PnmX | <i>Panicum antidotale</i> Retz.                                 | **        | <i>Panicum antidotale</i> Retz.                                 | 0.35±0.35 |
| Snch | <i>Senecio chrysanthemoides</i> DC.                             | **        | <i>Senecio chrysanthemoides</i> DC.                             | 0.24±0.24 |
| Phcm | <i>Phragmites australis</i> (Cay.) Trin. ex Steud               | **        | <i>Phragmites australis</i> (Cay.) Trin. ex Steud               | 1.17±0.65 |
| Bsam | <i>Bistorta amplexicaulis</i> (D.Don) Green                     | **        | <i>Bistorta amplexicaulis</i> (D.Don) Green                     | 0.25±0.25 |
| Sbng | <i>Saccharum bengalensis</i> Retz.                              | **        | <i>Saccharum bengalensis</i> Retz.                              | 1±0.75    |
| TmrX | <i>Tamarix aphyll</i> (L.) Karst.                               | **        | <i>Tamarix aphyll</i> (L.) Karst.                               | 0.2±0.2   |
| Frla | <i>Ferula northex</i> L.                                        | 0.30±0.30 | <i>Ferula northex</i> L.                                        | 0.25±0.25 |



|      |                                                              |           |                                                              |           |
|------|--------------------------------------------------------------|-----------|--------------------------------------------------------------|-----------|
| Hprm | <i>Hippophea rhamnoides</i> L.                               | **        | <i>Hippophea rhamnoides</i> L.                               | 0.26±0.26 |
| Arnd | <i>Arundo donax</i> L.                                       | **        | <i>Arundo donax</i> L.                                       | 0.44±0.44 |
| Eang | <i>Epilobium angustifolium</i> L.                            | **        | <i>Epilobium angustifolium</i> L.                            | 0.42±0.42 |
| Cglm | <i>Cyperus glomeratus</i> L.                                 | **        | <i>Cyperus glomeratus</i> L.                                 | 0.75±0.55 |
| Impt | <i>Impatiens bicolor</i> Royle.                              | **        | <i>Impatiens bicolor</i> Royle.                              | 0.6±0.41  |
| Fstc | <i>Festuca gigantea</i> (L.) Vill.                           | **        | <i>Festuca gigantea</i> (L.) Vill.                           | 1.20±0.66 |
| Dchn | <i>Duchesnea indica</i> (Andr.) Focke                        | **        | <i>Duchesnea indica</i> (Andr.) Focke                        | 1.79±1.01 |
| Pttd | <i>Pteridium aquilinum</i> (L.) Kuhn                         | **        | <i>Pteridium aquilinum</i> (L.) Kuhn                         | 0.35±0.35 |
| Onch | <i>Onychium contiguum</i> Wall. ex C. Hope                   | **        | <i>Onychium contiguum</i> Wall. ex C. Hope                   | 0.13±0.13 |
| Brgs | <i>Bergenia ciliata</i> (Haw.) Sternb. f. <i>ciliata</i> Yeo | **        | <i>Bergenia ciliata</i> (Haw.) Sternb. f. <i>ciliata</i> Yeo | 0.34±0.34 |
| Pwal | <i>Pinus wallichiana</i> A. B. Jackson                       | **        | <i>Pinus wallichiana</i> A. B. Jackson                       | 0.15±0.15 |
| Cdrd | <i>Cedrus deodara</i> (Roxb. ex D. Don) G. Don               | **        | <i>Cedrus deodara</i> (Roxb. ex D. Don) G. Don               | 1.13±0.80 |
| Lucs | <i>Leucas cephalotes</i> (Roth.) Spreng.                     | **        | <i>Leucas cephalotes</i> (Roth.) Spreng.                     | 0.92±0.65 |
| Swit | <i>Sambucus wightiana</i> Wall. ex Wight & Arn.              | **        | <i>Sambucus wightiana</i> Wall. ex Wight & Arn.              | 0.32±0.32 |
| Pmjr | <i>Plantago major</i> L.                                     | **        | <i>Plantago major</i> L.                                     | 1.23±0.83 |
| Bren | <i>Brassica nigra</i>                                        | **        | <i>Brassica nigra</i>                                        | 0.34±0.34 |
| Prpt | <i>Parrotiopsis jacquemontiana</i> (Dcne.) Rehder            | **        | <i>Parrotiopsis jacquemontiana</i> (Dcne.) Rehder            | 0.20±0.20 |
| Srbr | <i>Sorbaria tomentosa</i> (Lindl.) Rehder                    | **        | <i>Sorbaria tomentosa</i> (Lindl.) Rehder                    | 0.25±0.25 |
| Arsm | <i>Arisaema flavum</i> (Forsk.) Schott                       | **        | <i>Arisaema flavum</i> (Forsk.) Schott                       | 0.48±0.48 |
| Clnd | <i>Calendula arvensis</i> L.                                 | **        | <i>Calendula arvensis</i> L.                                 | 0.2±0.2   |
| Ptin | <i>Potentilla indica</i> (Andrews)                           | **        | <i>Potentilla indica</i> (Andrews)                           | 0.55±0.55 |
| Aarb | <i>Acacia Arabica</i> Mill.                                  | **        | <i>Acacia Arabica</i> Mill.                                  | 0.50±0.50 |
| Alci | <i>Eleusine indica</i> (L.) Gaertn.                          | 0.43±0.43 | <i>Eleusine indica</i> (L.) Gaertn.                          | **        |
| Mrbv | <i>Marrubium vulgare</i> L.                                  | 0.26±0.26 | <i>Marrubium vulgare</i> L.                                  | **        |
| Csct | <i>Cuscuta reflexa</i> Roxb.                                 | 0.17±0.17 | <i>Cuscuta reflexa</i> Roxb.                                 | **        |
| Jncs | <i>Juncus articulatus</i> L.                                 | 0.19±0.19 | <i>Juncus articulatus</i> L.                                 | **        |
| Rmrc | <i>Ranunculus muricatus</i> L.                               | 0.37±0.37 | <i>Ranunculus muricatus</i> L.                               | **        |
| Frgv | <i>Fragaria vesca</i> L.                                     | 0.14±0.14 | <i>Fragaria vesca</i> L.                                     | **        |
| Stlr | <i>Stellaria media</i> (L.) Vill.                            | 0.17±0.17 | <i>Stellaria media</i> (L.) Vill.                            | **        |
| Plnt | <i>Plantago lanceolata</i> L.                                | 0.15±0.15 | <i>Plantago lanceolata</i> L.                                | **        |

Note: \*\* represent absence of a species in the group; PC (Plant code)

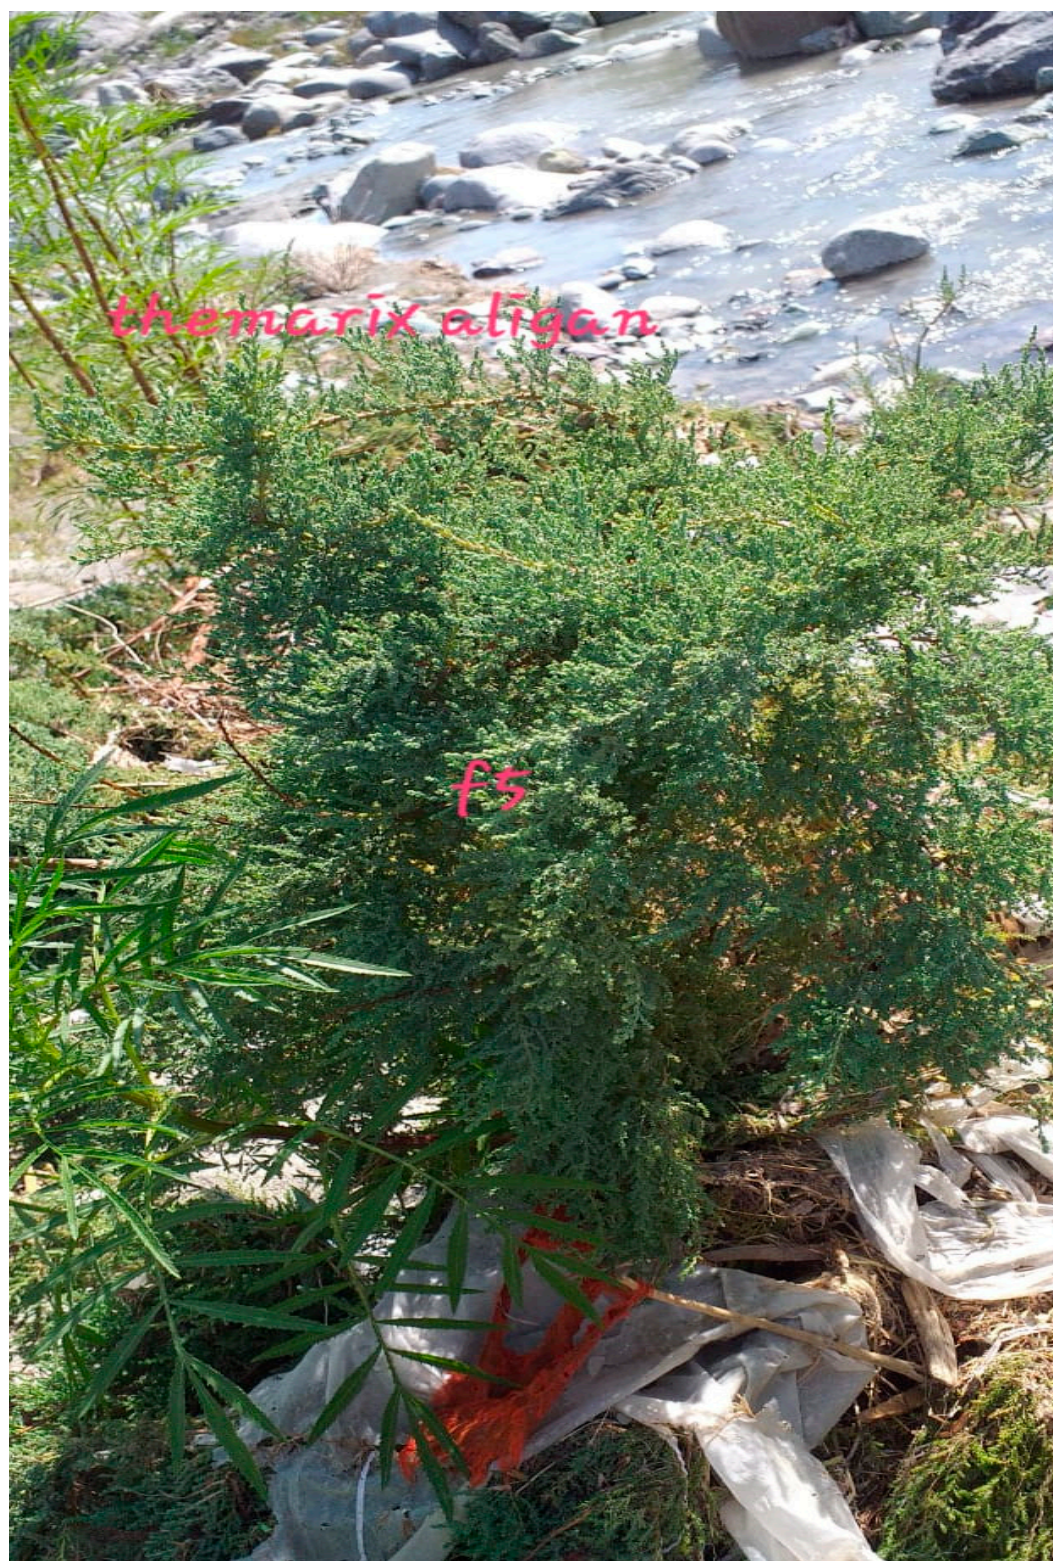



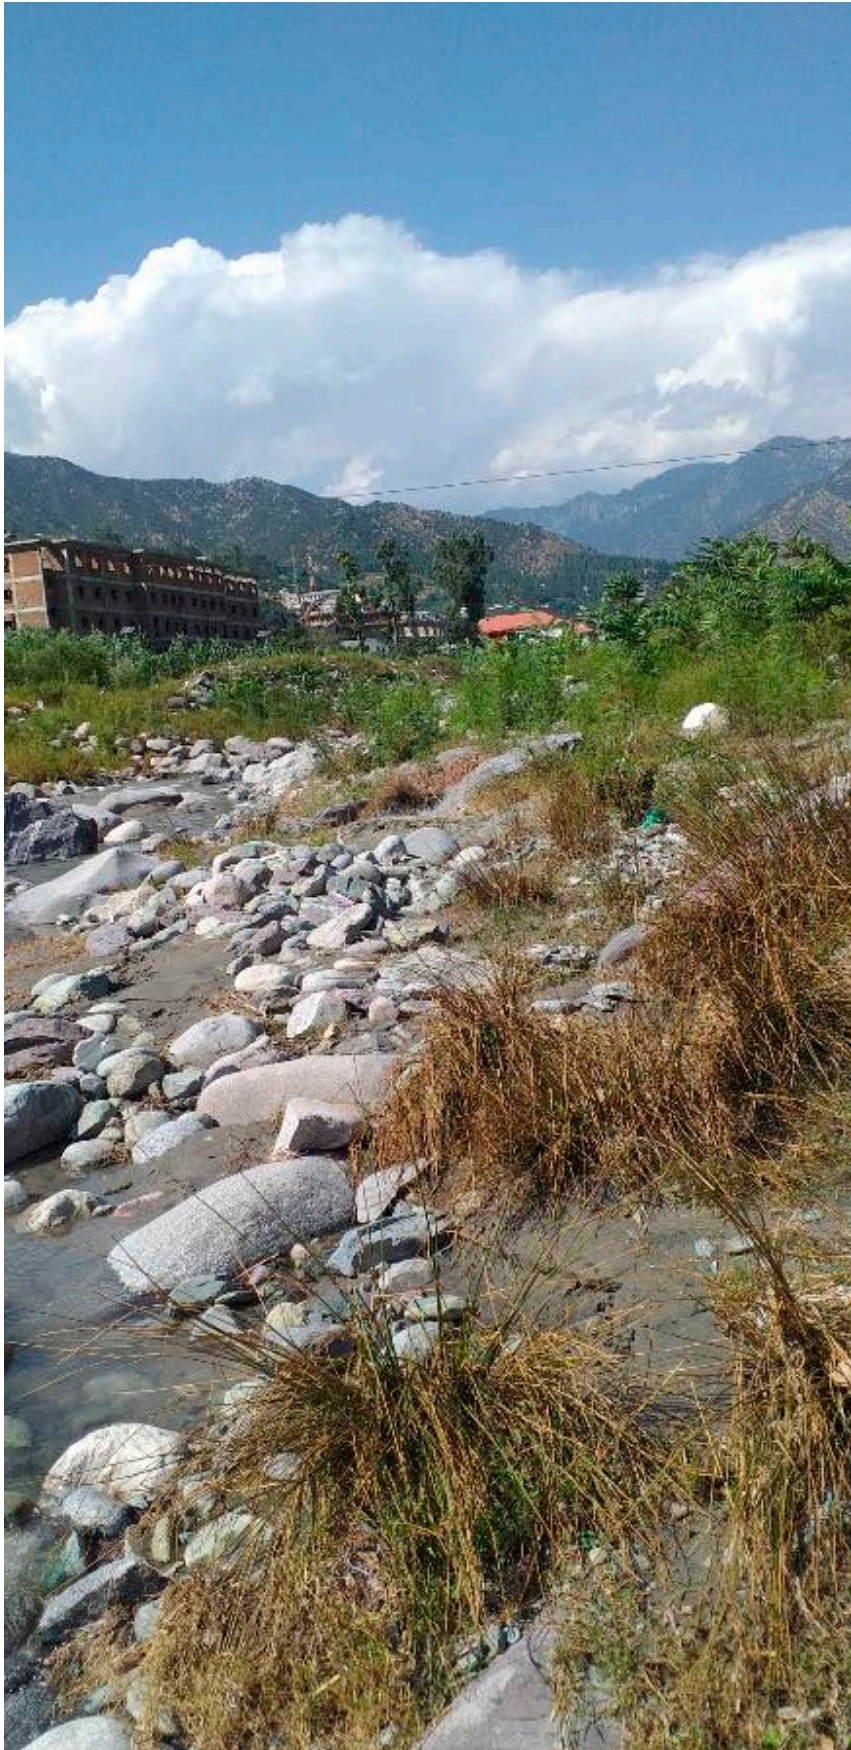



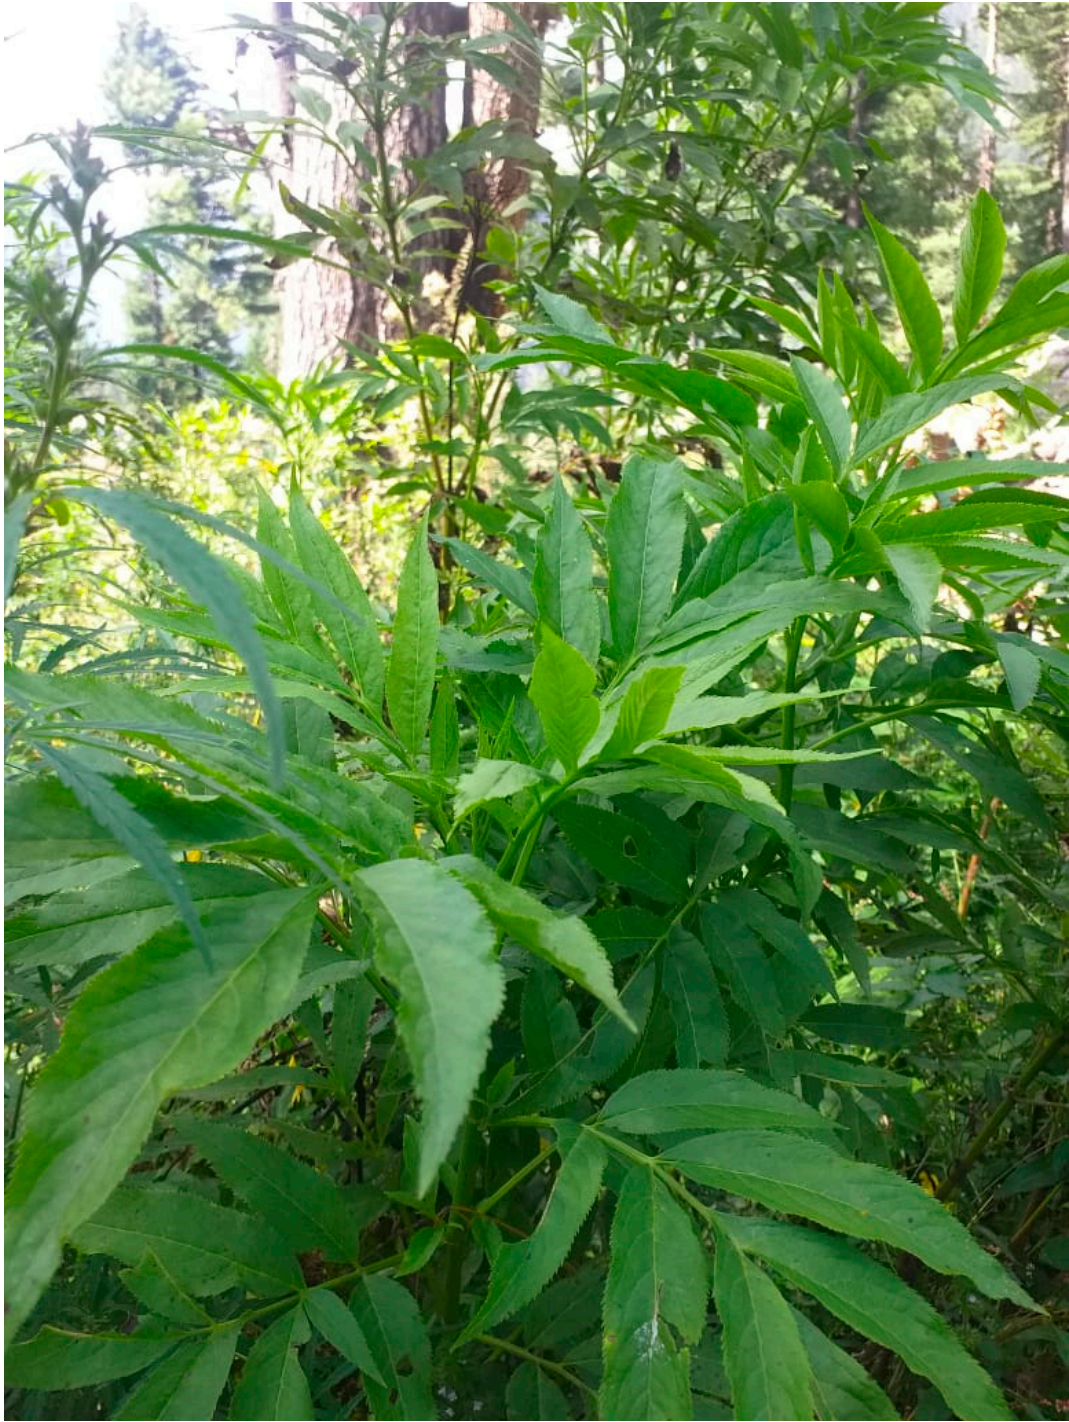



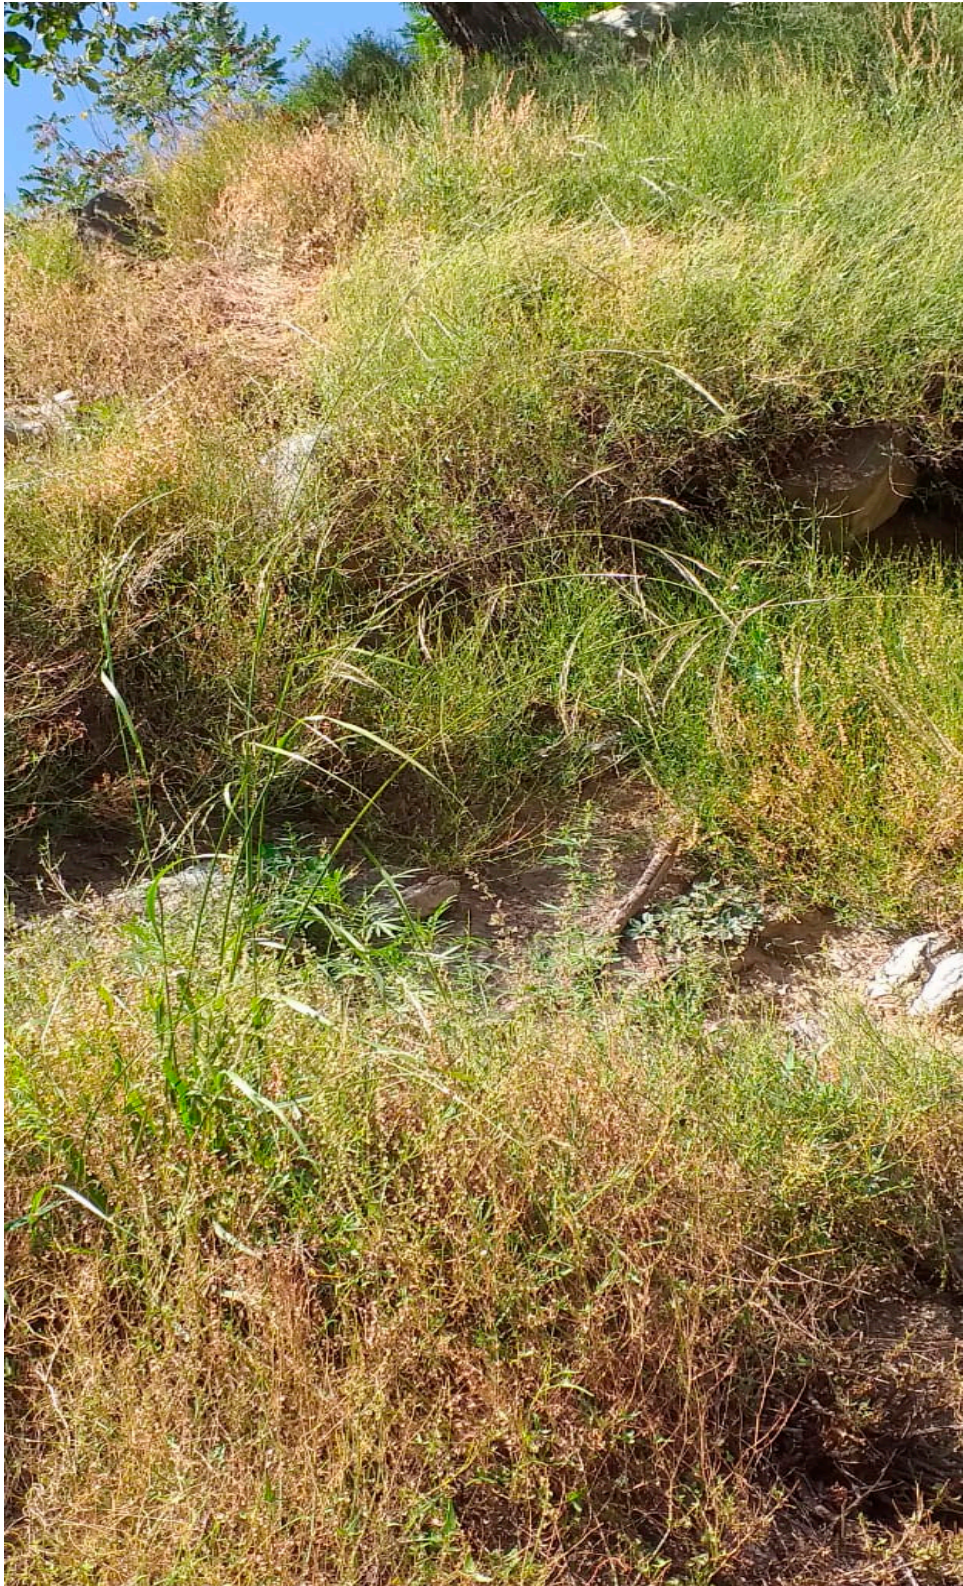



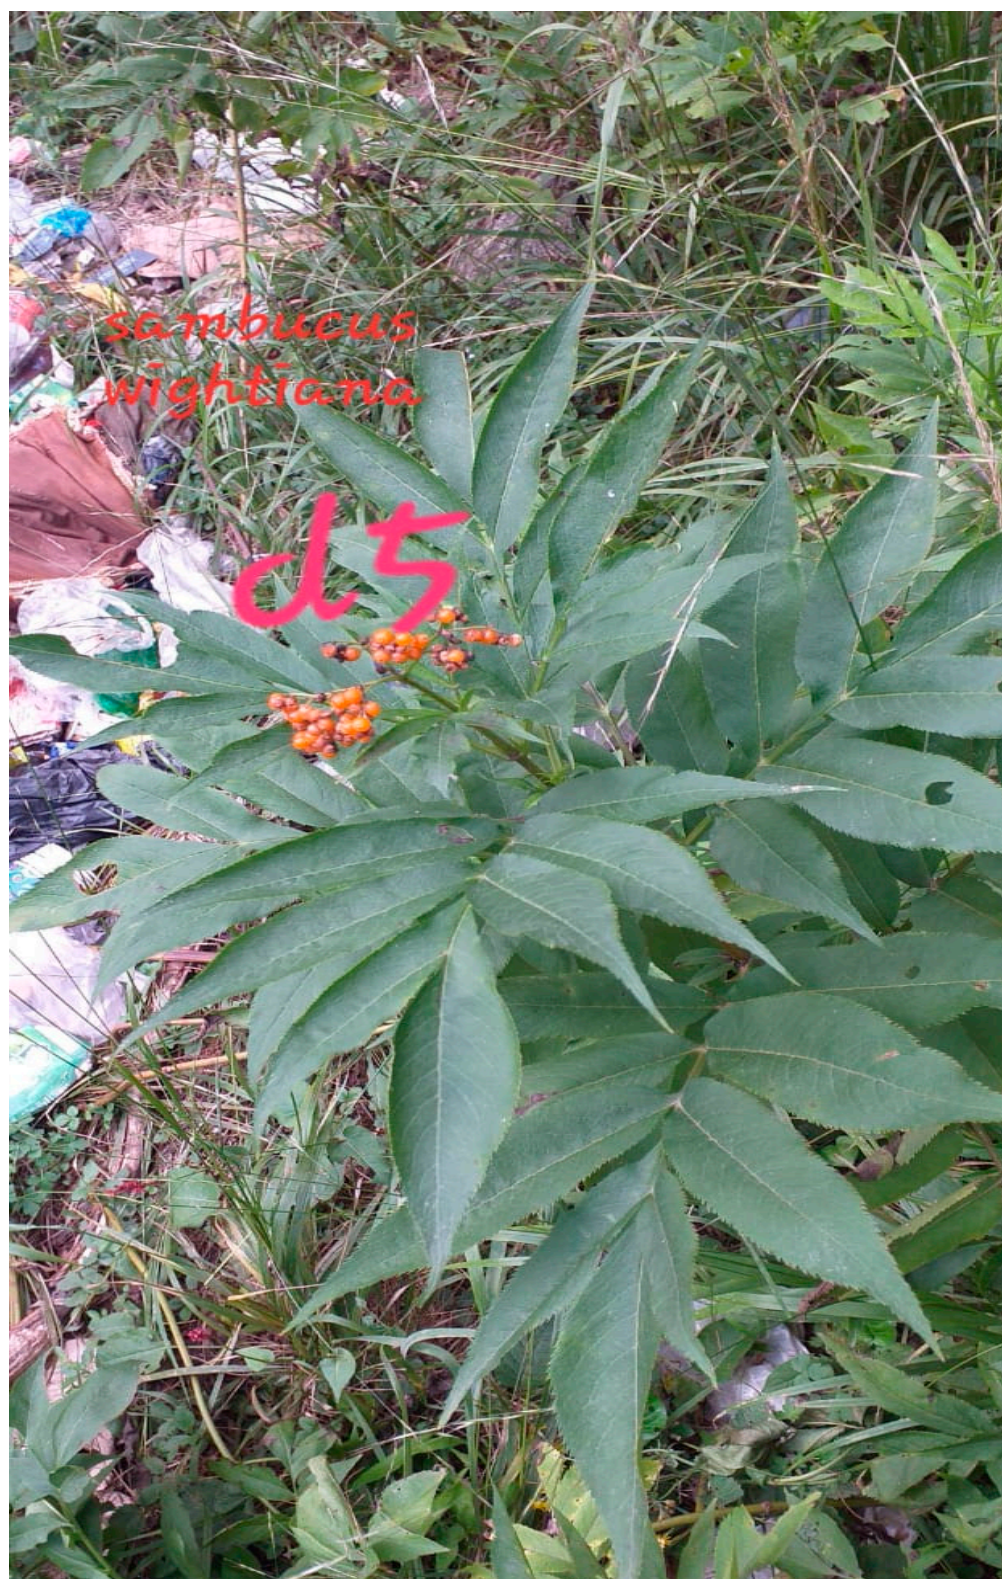

Supplement: s1 [file s1]
